# Supplementary material
Source: HighWire-hosted journal article supplement (https://www.cancerbiomed.org/content/19/5/755)
Supplement: media-1 [file media-1.pdf]

# Supplementary materials

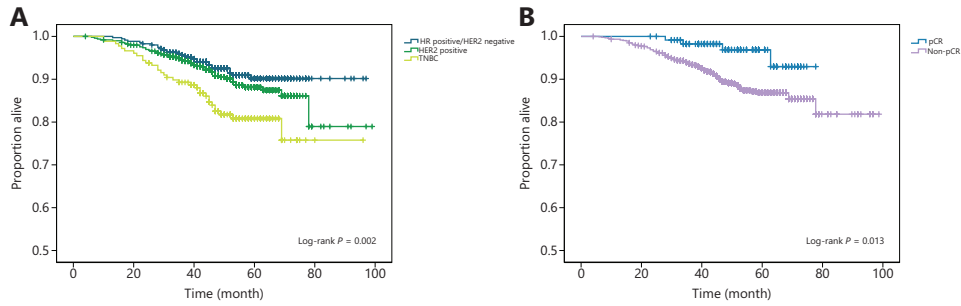

**Figure S1** The Kaplan-Meier method estimated overall survival by biological subtypes (A) and pathological response (B).

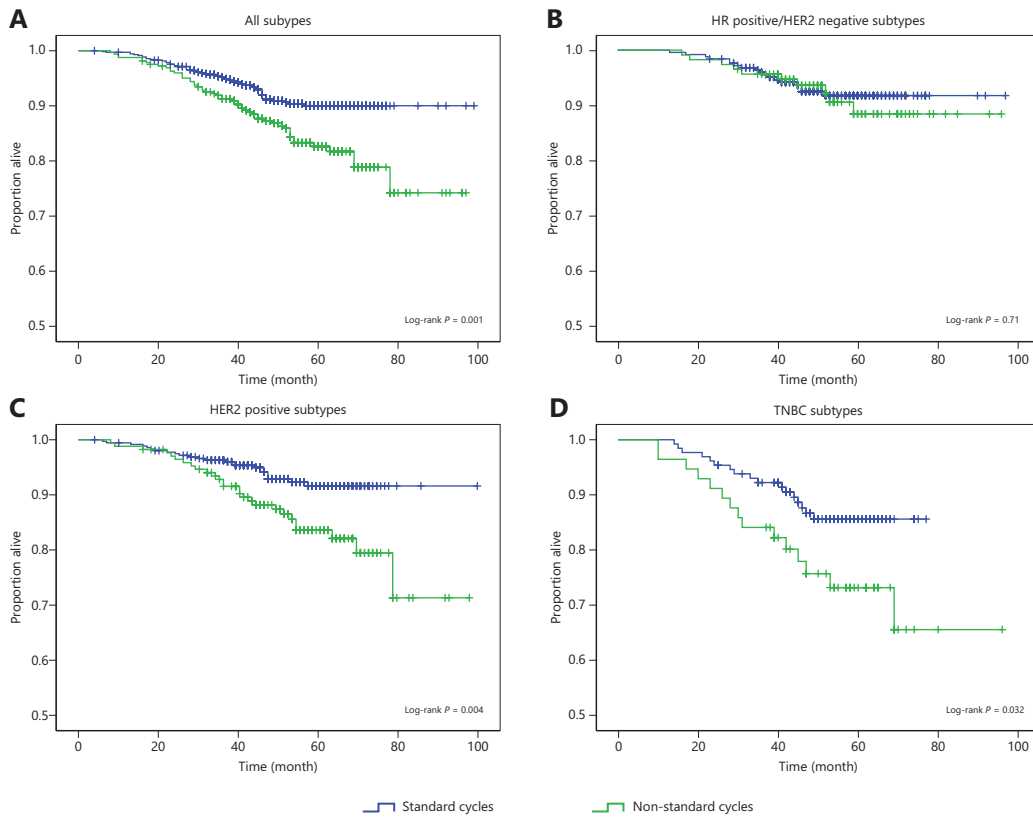

**Figure S2** The Kaplan-Meier method estimated overall survival by standard and non-standard neoadjuvant chemotherapy cycles in overall subtypes (A), HR positive/HER2 negative subtypes (B), HER2 positive subtypes (C), triple negative subtypes (D).

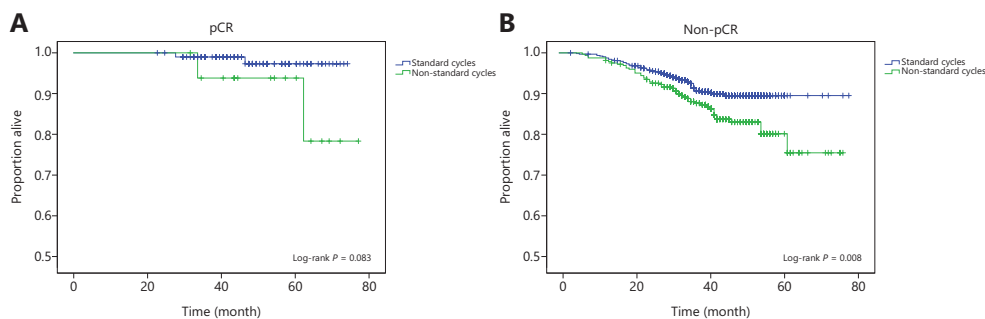

**Figure S3** The Kaplan-Meier method estimated overall survival by standard and non-standard neoadjuvant chemotherapy cycles, in patients with pathological complete response (pCR) (A), and patients with non-pCR (B).

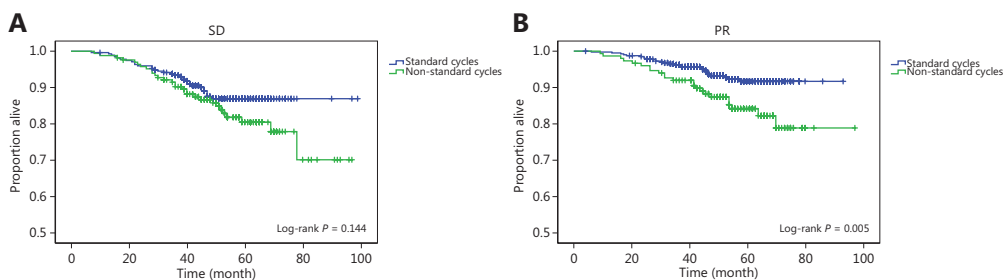

**Figure S4** The Kaplan-Meier method estimated overall survival by standard and non-standard neoadjuvant chemotherapy cycles, in patients with stable disease (A), patients with partial response (B).

**Table S1** The association between pathological response and long-term outcomes by tumor biological subtypes

| Pathological response     | Total | DFS    |                         | OS     |                         |
|---------------------------|-------|--------|-------------------------|--------|-------------------------|
|                           |       | Events | Log-rank <i>P</i> value | Events | Log-rank <i>P</i> value |
| Overall                   |       |        |                         |        |                         |
| pCR                       | 116   | 5      | <b>0.006*</b>           | 4      | <b>0.013*</b>           |
| Non-pCR                   | 908   | 131    |                         | 107    |                         |
| HR positive/HER2 negative |       |        |                         |        |                         |
| pCR                       | 26    | 0      | 0.11                    | 0      | 0.148                   |
| Non-pCR                   | 325   | 34     |                         | 28     |                         |
| HER2 positive             |       |        |                         |        |                         |
| pCR                       | 63    | 4      | 0.13                    | 3      | 0.185                   |
| Non-pCR                   | 432   | 63     |                         | 48     |                         |
| Triple negative           |       |        |                         |        |                         |
| pCR                       | 27    | 1      | <b>0.031*</b>           | 1      | <b>0.043*</b>           |
| Non-pCR                   | 151   | 34     |                         | 31     |                         |

\**P* < 0.05 was considered statistically significant.

HR, hormone receptor; HER2, human epidermal growth factor receptor-2; pCR, pathological complete response; DFS, disease-free survival; OS, overall survival.

**Table S2** Multivariate analyses for disease-free and overall survivals

|                                          | DFS                   |                     | OS                    |                     |
|------------------------------------------|-----------------------|---------------------|-----------------------|---------------------|
|                                          | Hazard ratio (95% CI) | <i>P</i> value      | Hazard ratio (95% CI) | <i>P</i> value      |
| Age at diagnosis                         | 1.01 (0.99, 1.02)     | 0.590               | 1.00 (0.98, 1.02)     | 0.841               |
| Clinical tumor stage                     |                       |                     |                       |                     |
| T1                                       | Ref                   |                     | Ref                   |                     |
| T2                                       | 0.99 (0.55, 1.77)     | 0.961               | 0.93 (0.49, 1.77)     | 0.832               |
| T3/T4                                    | 1.93 (1.02, 3.64)     | <b>0.044*</b>       | 2.04 (1.02, 4.07)     | <b>0.044*</b>       |
| Biological subtype                       |                       |                     |                       |                     |
| HR positive/HER2 negative                | Ref                   |                     | Ref                   |                     |
| HER2 positive                            | 1.53 (1.01, 2.32)     | <b>0.047*</b>       | 1.38 (0.86, 2.20)     | 0.179               |
| Triple negative                          | 2.55 (1.58, 4.10)     | <b>&lt; 0.0001*</b> | 2.81 (1.68, 4.69)     | <b>&lt; 0.0001*</b> |
| Post-neoadjuvant pathological node stage |                       |                     |                       |                     |
| ypN0                                     | Ref                   |                     | Ref                   |                     |
| ypN1                                     | 1.52 (0.93, 2.48)     | 0.093               | 1.47 (0.85, 2.54)     | 0.17                |
| ypN2                                     | 3.45 (2.16, 5.51)     | <b>&lt; 0.0001*</b> | 3.39 (2.01, 5.71)     | <b>&lt; 0.0001*</b> |
| ypN3                                     | 3.22 (1.96, 5.28)     | <b>&lt; 0.0001*</b> | 3.41 (1.98, 5.85)     | <b>&lt; 0.0001*</b> |
| NAC cycles                               |                       |                     |                       |                     |
| Non-standard cycles                      | Ref                   |                     | Ref                   |                     |
| Standard cycles                          | 0.62 (0.44, 0.88)     | <b>0.007*</b>       | 0.54 (0.37, 0.79)     | <b>0.001*</b>       |

\**P* < 0.05 was considered statistically significant.

ER, estrogen receptor; PgR, progesterone receptor; HER2, human epidermal growth factor receptor-2; HR, hormone receptor; pCR, pathological complete response; NAC, neoadjuvant chemotherapy.
